# Supplementary material for: Compressive molding of engineered tissues via thermoresponsive hydrogel devices
Source: Royal Society of Chemistry journal article supplement (doi:10.1039/d3lc00007a), 2023-01-01
Supplement: d3lc00007a1.pdf [file d3lc00007a1.pdf]

## Compressive molding of engineered tissues via thermoresponsive hydrogel devices

Camille Cassel de Camps<sup>1#</sup>, Stephanie Mok<sup>2#</sup>, Emily Ashby<sup>2</sup>, Chen Li<sup>2</sup>, Paula Lépine<sup>3</sup>, Thomas M. Durcan<sup>3</sup>, Christopher Moraes<sup>1,2,4,5\*</sup>

1. Department of Biomedical Engineering, McGill University, Montréal, H3A 2B4 QC Canada

2. Department of Chemical Engineering, McGill University, Montréal, H3A 0C5 QC Canada

3. Early Drug Discovery Unit (EDDU), Montreal Neurological Institute and Hospital, McGill University, 3801 University Street, Montréal, H3A 2B4 QC Canada

4. Rosalind and Morris Goodman Cancer Institute, McGill University, Montréal, H3A 1A3 QC Canada

5. Division of Experimental Medicine, McGill University, Montréal, H4A 3J1, QC Canada

# These authors contributed equally

\* Corresponding author: [chris.moraes@mcgill.ca](mailto:chris.moraes@mcgill.ca)

### Supplementary Information

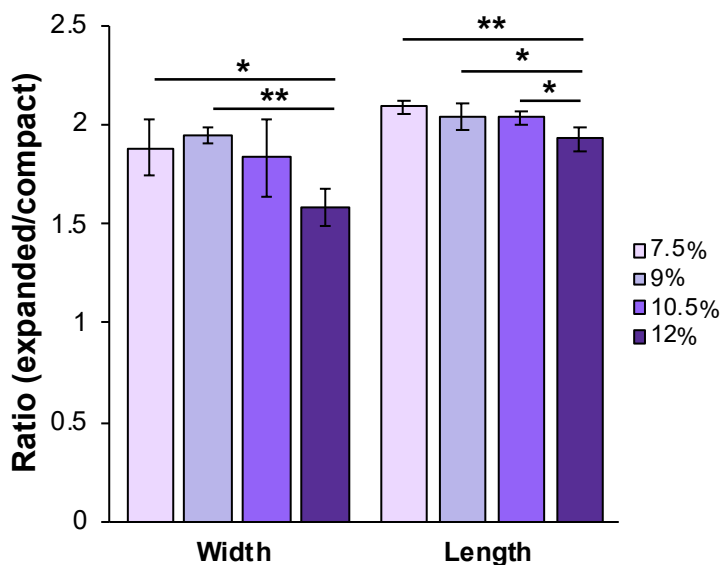

**Supplementary Figure 1. Compaction ratios of varied PNIPAM formulations.** CHyMs with rectangular cavities were fabricated with varying amounts of PNIPAM, from 7.5-12% in the final gel mixture. Degree of contraction was significantly different for varied formulations, but relatively robust across multiple formulations, with only the highest concentration of PNIPAM compacting slightly less (data presented as mean  $\pm$  standard deviation;  $n = 4$ ; \* $p < 0.05$ , \*\* $p < 0.01$  by one-way ANOVA with Tukey post hoc comparisons).

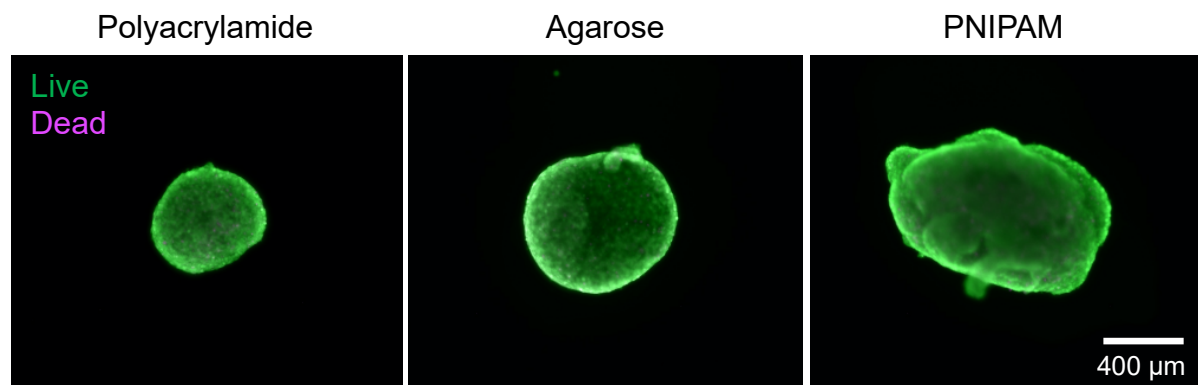

**Supplementary Figure 2. Viability of spheroids grown in various hydrogel microwells.** T47D spheroids were formed and cultured in hydrogel microwells for 3 days before live/dead staining. Spheroids were then removed from microwells for imaging.

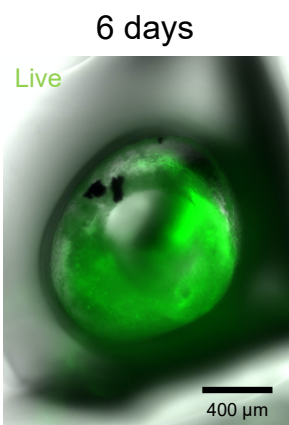

**Supplementary Figure 3. Brain organoid viability in long-term culture.** A brain organoid grown for 6 days in a CHyM, with live staining on the final day of culture. (Compacted PNIPAM presents some light-scattering difficulties.)

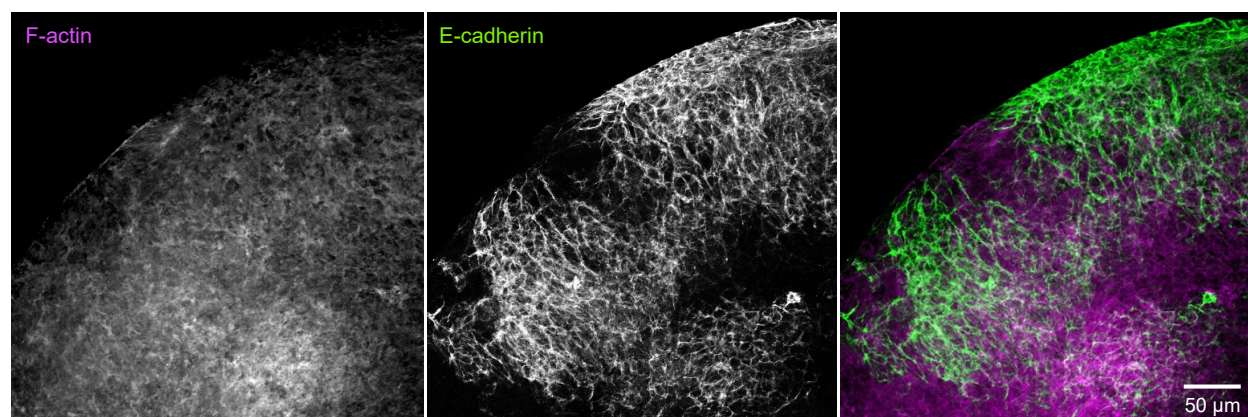

**Supplementary Figure 4. Early-stage brain organoids express E-cadherin before compression in CHyMs.** 10-day old brain organoid stained for E-cadherin and filamentous actin (F-actin), shown at the organoid periphery.
